# Supplementary material for: Practical guidance for firefighter applicants preparing for cardiorespiratory fitness testing: a secondary analysis of self-reported physical activity levels
Source: PeerJ journal article supplement (doi:10.7717/peerj.13832), 2022-09-05
Supplement: Addendum_1.pdf [file Addendum_1.pdf]

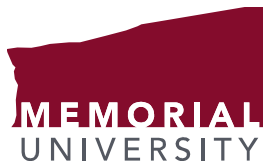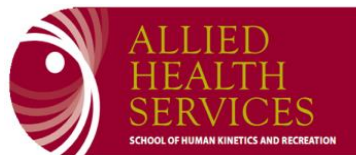

## **PHYSICAL ACTIVITY READINESS QUESTIONNAIRE (PAR-Q)**

**Your comments and responses on the questionnaire are confidential and will be handled according to the ethical guidelines of the Canadian Society of Exercise Physiology (CSEP)**

Name: \_\_\_\_\_

Address:

Street: \_\_\_\_\_

City/Province: \_\_\_\_\_

Postal Code: \_\_\_\_\_

Phone: \_\_\_\_\_

Email: \_\_\_\_\_

Date of Birth: \_\_\_\_\_

Age: \_\_\_\_\_ Sex: \_\_\_\_\_

Height: \_\_\_\_\_ Weight: \_\_\_\_\_

Occupation: \_\_\_\_\_

Emergency Contact Information:

Name: \_\_\_\_\_

Phone: \_\_\_\_\_ Relationship: \_\_\_\_\_

Signature: \_\_\_\_\_ Date: \_\_\_\_\_

**1. RISKS ASSOCIATED WITH CARDIOVASCULAR PROBLEMS**

|                                                                                            | <b>YES</b>               | <b>NO</b>                |
|--------------------------------------------------------------------------------------------|--------------------------|--------------------------|
| 1.1 How long ago since you have seen a doctor?                                             |                          |                          |
| - less than 6 months                                                                       | <input type="checkbox"/> | <input type="checkbox"/> |
| - 6 to 18 months (half a year to a year)                                                   | <input type="checkbox"/> | <input type="checkbox"/> |
| - more than 18 months (year and a half)                                                    | <input type="checkbox"/> | <input type="checkbox"/> |
| 1.2 Has your doctor ever told you that you have a heart problem?                           | <input type="checkbox"/> | <input type="checkbox"/> |
| 1.3 Do you experience chest or heart pains frequently?                                     | <input type="checkbox"/> | <input type="checkbox"/> |
| 1.4 Do you experience dizziness or weakness frequently?                                    | <input type="checkbox"/> | <input type="checkbox"/> |
| 1.5 Do you ever have palpitations, that is, your heart beating more rapidly for no reason? | <input type="checkbox"/> | <input type="checkbox"/> |
| 1.6 Do you have bad headaches?                                                             | <input type="checkbox"/> | <input type="checkbox"/> |
| 1.7 Are your ankles and/or knees often swollen (without being a result of an injury)?      | <input type="checkbox"/> | <input type="checkbox"/> |

*Comments:*

---



---



---



---

**2. RESPIRATORY SYSTEM**

|                              | <b>YES</b>               | <b>NO</b>                |
|------------------------------|--------------------------|--------------------------|
| 2.1 Do you suffer from:      |                          |                          |
| - asthma                     | <input type="checkbox"/> | <input type="checkbox"/> |
| - bronchitis                 | <input type="checkbox"/> | <input type="checkbox"/> |
| - emphysema                  | <input type="checkbox"/> | <input type="checkbox"/> |
| - other respiratory sickness | <input type="checkbox"/> | <input type="checkbox"/> |
| - sleep apnea                | <input type="checkbox"/> | <input type="checkbox"/> |

*Specify* \_\_\_\_\_

**3. METABOLIC PROBLEMS**

|                                                                  | <b>YES</b>               | <b>NO</b>                |
|------------------------------------------------------------------|--------------------------|--------------------------|
| 3.1 Within the past six months has your doctor said to you that: |                          |                          |
| -you have hypertension                                           | <input type="checkbox"/> | <input type="checkbox"/> |
| -you have type II diabetes                                       | <input type="checkbox"/> | <input type="checkbox"/> |
| -you have impaired glucose tolerance                             | <input type="checkbox"/> | <input type="checkbox"/> |
| -you have hypercholesterolemia                                   | <input type="checkbox"/> | <input type="checkbox"/> |
| -you have high triglycerides                                     | <input type="checkbox"/> | <input type="checkbox"/> |
| -you have low HDL                                                | <input type="checkbox"/> | <input type="checkbox"/> |
| -you are obese                                                   | <input type="checkbox"/> | <input type="checkbox"/> |

*Others:* \_\_\_\_\_

#### 4. **LOCOMOTOR SYSTEM**

|                                                                                                                                                  | YES                      | NO                       |
|--------------------------------------------------------------------------------------------------------------------------------------------------|--------------------------|--------------------------|
| 4.1 Has your doctor ever told you that you have bone or joint problems (such as arthritis for example) which might be worsened through exercise? | <input type="checkbox"/> | <input type="checkbox"/> |
| 4.2 Do you suffer from:                                                                                                                          |                          |                          |
| -frequent back pain                                                                                                                              | <input type="checkbox"/> | <input type="checkbox"/> |
| -hernia                                                                                                                                          | <input type="checkbox"/> | <input type="checkbox"/> |
| -spinal cord problems/vertebral column problems                                                                                                  | <input type="checkbox"/> | <input type="checkbox"/> |
| -problems with your meniscus (joints)                                                                                                            | <input type="checkbox"/> | <input type="checkbox"/> |
| -ligament problems                                                                                                                               | <input type="checkbox"/> | <input type="checkbox"/> |
| -tendon problems                                                                                                                                 | <input type="checkbox"/> | <input type="checkbox"/> |

Comments: \_\_\_\_\_

\_\_\_\_\_

\_\_\_\_\_

#### 5. **RISKS ASSOCIATED WITH FAMILY PREDISPOSITION**

|                                                                                                              | YES                      | NO                       |
|--------------------------------------------------------------------------------------------------------------|--------------------------|--------------------------|
| 5.1 Are there any members of your family (parents, grandparents, brothers, sisters, aunts, uncles) who have: |                          |                          |
| - suffered from chronic high blood pressure                                                                  | <input type="checkbox"/> | <input type="checkbox"/> |
| <i>if yes, how many member(s)</i> _____                                                                      |                          |                          |
| - suffered from adult-onset diabetes                                                                         | <input type="checkbox"/> | <input type="checkbox"/> |
| <i>if yes, how many member(s)</i> _____                                                                      |                          |                          |
| - suffered from juvenile diabetes                                                                            | <input type="checkbox"/> | <input type="checkbox"/> |
| <i>if yes, how many member(s)</i> _____                                                                      |                          |                          |
| - died from a heart attack before the age of 60                                                              | <input type="checkbox"/> | <input type="checkbox"/> |
| <i>if yes, how many member(s)</i> _____                                                                      |                          |                          |

Comments: \_\_\_\_\_

\_\_\_\_\_

\_\_\_\_\_

#### 6. **NEUROLOGICAL PROBLEMS**

|                                                           | YES                      | NO                       |
|-----------------------------------------------------------|--------------------------|--------------------------|
| 6.1 Have you ever had a head injury or concussion?        | <input type="checkbox"/> | <input type="checkbox"/> |
| - were you treated by a physician?                        | <input type="checkbox"/> | <input type="checkbox"/> |
| - were you hospitalized?                                  | <input type="checkbox"/> | <input type="checkbox"/> |
| <i>if yes, when</i> _____                                 |                          |                          |
| - what were your symptoms? _____                          |                          |                          |
| - how long did they last? _____                           |                          |                          |
| 6.2 Have you ever become unconscious or lost your memory? | <input type="checkbox"/> | <input type="checkbox"/> |
| 6.3 Have you ever had a seizure?                          | <input type="checkbox"/> | <input type="checkbox"/> |
| 6.4 Do you have frequent or severe headaches?             | <input type="checkbox"/> | <input type="checkbox"/> |

|                                                                      | YES                      | NO                       |
|----------------------------------------------------------------------|--------------------------|--------------------------|
| 6.5 Have you ever had tingling into your arms, hands, legs, or feet? | <input type="checkbox"/> | <input type="checkbox"/> |
| 6.6 Have you ever had a nerve injury?                                | <input type="checkbox"/> | <input type="checkbox"/> |

**7. OTHERS/MISCELLANEOUS**

|                                                                                                                                                                       | YES                      | NO                       |
|-----------------------------------------------------------------------------------------------------------------------------------------------------------------------|--------------------------|--------------------------|
| 7.1 Have you had a major surgical operation within the past two years, or an illness requiring a stay in the hospital?<br><i>if yes, specify:</i> _____               | <input type="checkbox"/> | <input type="checkbox"/> |
| 7.2 Are you still suffering the operation or illness?                                                                                                                 | <input type="checkbox"/> | <input type="checkbox"/> |
| 7.3 Do you feel ill?                                                                                                                                                  | <input type="checkbox"/> | <input type="checkbox"/> |
| 7.4 Are there other physical reasons which would prevent you from following a physical exercise program even if you wanted to do so?<br><i>if yes, specify:</i> _____ | <input type="checkbox"/> | <input type="checkbox"/> |

**8. PHYSICAL ACTIVITY AND EXERCISE HABITS**

|                                                       | YES                      | NO                       |
|-------------------------------------------------------|--------------------------|--------------------------|
| Have you been physically active for one year or more? | <input type="checkbox"/> | <input type="checkbox"/> |

*If yes, indicate the number of minutes per week currently performing for each activity on the next page:*

| <u>ACTIVITIES</u>  | <u>MINUTES/WEEK</u> | <u>ACTIVITIES</u>      | <u>MINUTES/WEEK</u> |
|--------------------|---------------------|------------------------|---------------------|
| Dance              | _____               | Racquetball            | _____               |
| Folk Dance         | _____               | Tennis                 | _____               |
| Canoeing           | _____               | Kayaking               | _____               |
| Climbing           | _____               | Martial Arts/Combative | _____               |
| Squash             | _____               | Basketball             | _____               |
| Baseball/Softball  | _____               | Volleyball             | _____               |
| Soccer             | _____               | Running                | _____               |
| Hockey             | _____               | Ice Skating            | _____               |
| Badminton          | _____               | Bicycling              | _____               |
| Volleyball         | _____               | Swimming               | _____               |
| Curling            | _____               | Cross-Country Skiing   | _____               |
| Stationary Bicycle | _____               | Downhill Skiing        | _____               |
| Jump Rope          | _____               | Diving                 | _____               |
| Brisk Walking      | _____               | Rollerblading          | _____               |
| Rowing             | _____               | Sailing                | _____               |
| Wrestling          | _____               | Handball               | _____               |
| Snowshoeing        | _____               | Weight Training        | _____               |

If the activities that you practice are not indicated in the list, please list them below and indicate the number of minutes a week.

| <u>ACTIVITIES</u> | <u>MINUTES/WEEK</u> |
|-------------------|---------------------|
| _____             | _____               |
| _____             | _____               |
| _____             | _____               |
| _____             | _____               |

**Athletes:**

Are you currently:

- resting
- beginning training
- competing
- ill

Number of week(s): \_\_\_\_\_

Number of week(s): \_\_\_\_\_

Number of week(s): \_\_\_\_\_

Number of week(s): \_\_\_\_\_

*Comments:* \_\_\_\_\_

\_\_\_\_\_

\_\_\_\_\_

**9. TOBACCO/TOXINS****YES NO**

9.1 Do you smoke?

☐ ☐

9.2 Have you ever smoked?

☐ ☐*If yes for question 9.1 or 9.2:**A – Cigarettes*

How many do/did you consume in a day?

10 or less ☐20-30 ☐20 or less ☐30 or more ☐*B – Pipe/Cigars*

How often do/did you smoke pipes/cigars?

Occasionally ☐Regularly ☐*C – For how many year(s) have you been smoking (or for how many years did you smoke)?*Less than a year ☐2-5 years ☐More than 5 years ☐*D – If you used to smoke but don't smoke any longer, how many year(s) since you stopped?*

\_\_\_\_\_ year(s)

**10. DIETARY HABITS****YES NO**

10.1 Do you make time to eat breakfast each morning?

☐ ☐

10.2 Is it important for you to consume three meals each day?

☐ ☐

10.3 Have you ever been instructed by a dietitian or receive nutritional counseling from another health care providers?

☐ ☐*if yes, when?* \_\_\_\_\_

10.4 Have you ever followed a diet program in the past?

☐ ☐*if yes, when and what program?* \_\_\_\_\_

10.5 How many cup(s) of caffeine beverages (coffee and/or tea) do you consume each day?

2 or less ☐3-5 ☐6 or more ☐

10.6 Indicate the number of alcoholic beverage(s) you consume each week (beer, wine, spirits)?

Never Have ☐Quit ☐1-2 ☐3-6 ☐7-24 ☐25+ ☐

**11. STRESSORS**

|                                                                                                                                                                            | <b>YES</b>               | <b>NO</b>                |
|----------------------------------------------------------------------------------------------------------------------------------------------------------------------------|--------------------------|--------------------------|
| 11.1 Is your profession or work liable to increase, in a potentially harmful way, your stress levels and make you irritable?<br><i>what is your profession/work?</i> _____ | <input type="checkbox"/> | <input type="checkbox"/> |
| 11.2 Do you have difficulty falling asleep or sleeping uninterrupted for at least 6 hours?                                                                                 | <input type="checkbox"/> | <input type="checkbox"/> |
| 11.3 What is your average daily number of hours of sleep? _____                                                                                                            |                          |                          |

**12. WEIGHT**

|                                                                                  |                          |                          |
|----------------------------------------------------------------------------------|--------------------------|--------------------------|
| 12.1 In your opinion, is your weight 10 kg (25 lbs) or more above normal weight? | <input type="checkbox"/> | <input type="checkbox"/> |
| 12.2 Do you have trouble gaining or losing weight?                               | <input type="checkbox"/> | <input type="checkbox"/> |
| 12.3 Have you experienced any recent weight change?                              | <input type="checkbox"/> | <input type="checkbox"/> |

**13. MEDICATIONS**

|                                                                                                                    |                          |                          |
|--------------------------------------------------------------------------------------------------------------------|--------------------------|--------------------------|
| 13.1 Do you take any medications regularly?<br>(example: for high blood pressure)<br><i>if yes, specify:</i> _____ | <input type="checkbox"/> | <input type="checkbox"/> |
| _____                                                                                                              |                          |                          |
| _____                                                                                                              |                          |                          |

**14. FOR WOMEN ONLY**

|                                                                                                                         | <b>YES</b>               | <b>NO</b>                |
|-------------------------------------------------------------------------------------------------------------------------|--------------------------|--------------------------|
| 14.1 Do you have gynecological problems which are heightened by physical activity?<br><i>if yes, specify:</i> _____     | <input type="checkbox"/> | <input type="checkbox"/> |
| _____                                                                                                                   |                          |                          |
| _____                                                                                                                   |                          |                          |
| 14.2 Are you pregnant?                                                                                                  | <input type="checkbox"/> | <input type="checkbox"/> |
| 14.3 How many times have you been pregnant? _____                                                                       |                          |                          |
| 14.4 How many full-term pregnancies have you had? _____                                                                 |                          |                          |
| 14.5 Are you presently taking oral contraceptives?                                                                      | <input type="checkbox"/> | <input type="checkbox"/> |
| 14.6 Have you ever taken oral contraceptives?                                                                           | <input type="checkbox"/> | <input type="checkbox"/> |
| 14.7 If you answered yes to questions 14.5 and 14.6, for how long do/did you use them on a regular basis? _____ year(s) |                          |                          |

14.8 If you have already used them in the past and no longer use them, how long ago did you stop?  
 \_\_\_\_\_ year(s)

**YES****NO**

14.9 Are your menstrual cycles generally regular  
 (between 25 and 35 days)?

☐☐

*if no, do they happen more frequently*

*(less than 25 days between)?*

☐☐

*or, do they happen less frequently*

*(more than 35 days between)?*

☐☐

14.10 Are you menopausal?

☐☐

*if yes, for how long: \_\_\_\_\_ year(s)*

14.11 Have you experienced long periods without menstruating?

☐☐

*Comments:* \_\_\_\_\_

\_\_\_\_\_

\_\_\_\_\_
